# Supplementary material for: Guaiazulene revisited: a new material for green-processed optoelectronics
Source: Royal Society of Chemistry journal article supplement (doi:10.1039/d0py01355b), 2020-01-01
Supplement: d0py01355b1.pdf [file d0py01355b1.pdf]

# Supporting Information

## Guaiazulene Revisited: A New Material for Green-Processed Optoelectronics

David Bilger,<sup>a</sup> Kwang-Won Park,<sup>a</sup> Ali Abdel-Maksoud,<sup>b</sup> and Trisha L. Andrew<sup>a,c,\*</sup>

<sup>a</sup>Department of Chemistry, University of Massachusetts Amherst, Amherst, MA, 01003, United States

<sup>b</sup>Department of Electrical Engineering, University of Massachusetts Amherst, Amherst, MA, 01003, United States

<sup>c</sup>Department of Chemical Engineering, University of Massachusetts Amherst, Amherst, MA, 01003, United States

\*[tandrew@umass.edu](mailto:tandrew@umass.edu)

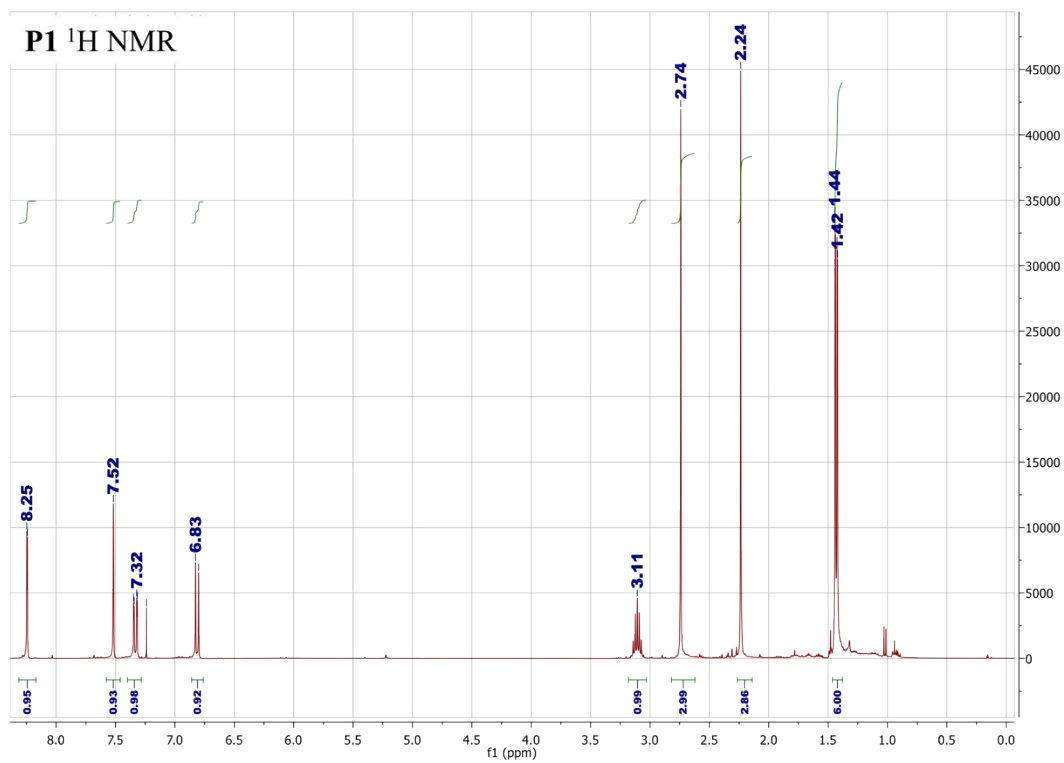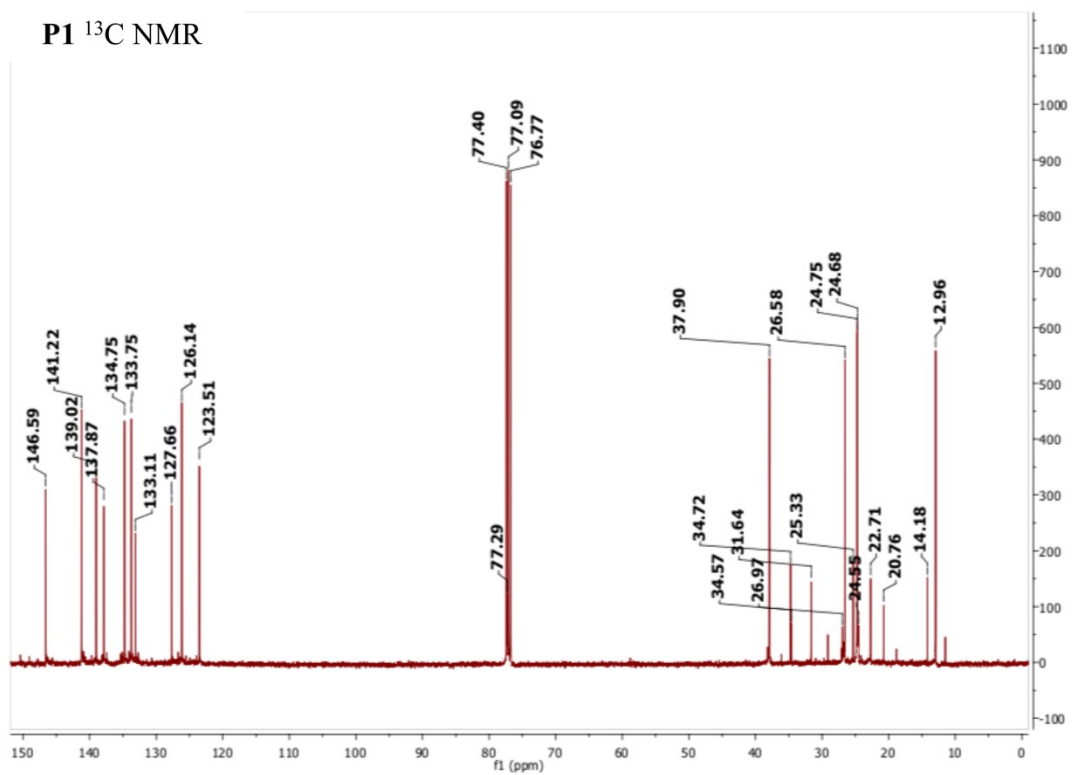

**Figure S1.**  $^1\text{H}$  NMR (top) and  $^{13}\text{C}$  NMR (bottom) spectra of **P1** in deuterated chloroform ( $\text{CDCl}_3$ ).

DFT / B3LYP / 6-311+G (2d, p) / Chloroform

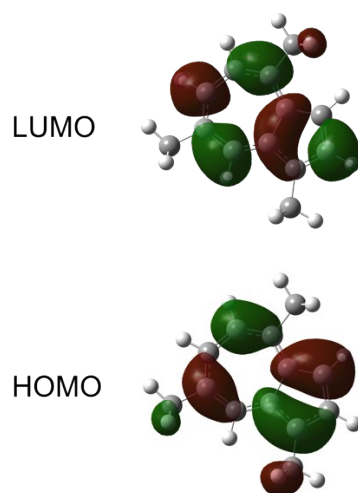

**Figure S2.** DFT calculation of the HOMO-LUMO electronic structure of guaiazulene. The isopropyl group was omitted from the calculations to minimize computational cost.

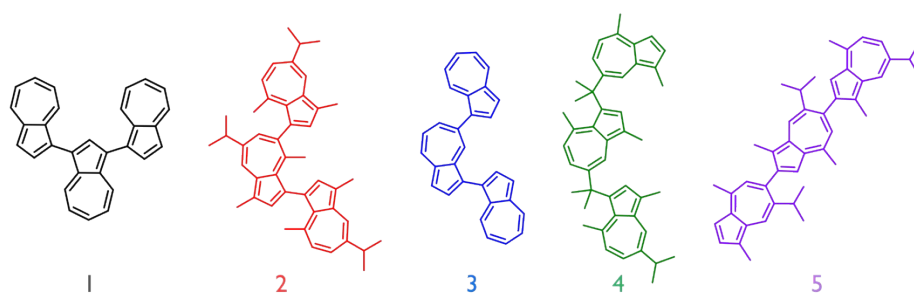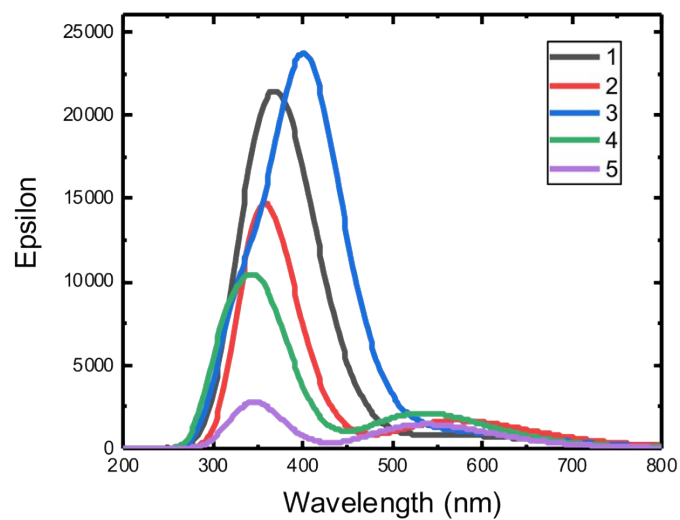

**Figure S3.** TD-DFT calculations of azulene and guaiazulene-based trimers conducted using the CAM-B3LYP functional and a 6-311+G (2d, p) basis set.

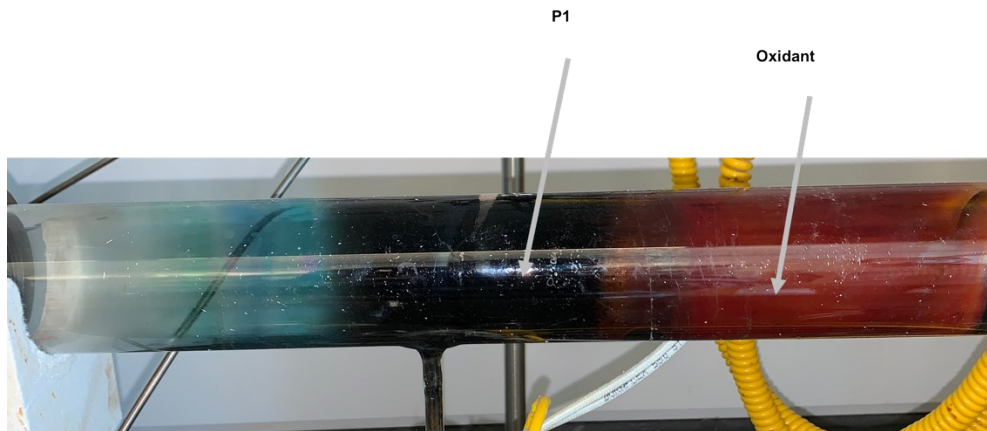

**Figure S4.** Optical image of the reactor following a successful reactive vapor deposition (RVD). The black region consists of condensed polymer (**P1**). The brown region consists of condensed oxidant ( $\text{FeCl}_3$ ).

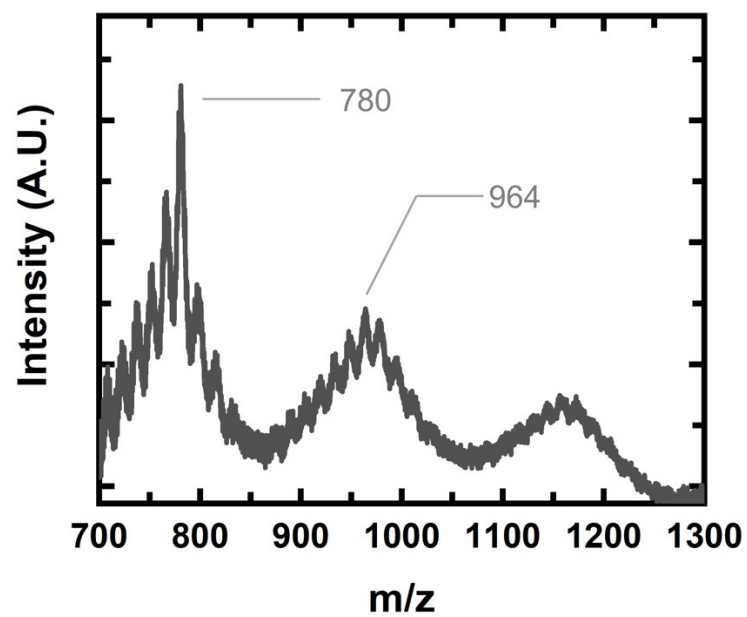

**Figure S5.** LDI-MS of the soluble fractions of RVD films isolated from inside the reactor.
